# Supplementary material for: Mode-specific study of nanoparticle-mediated optical interactions in an absorber/metal thin film system
Source: Royal Society of Chemistry journal article supplement (doi:10.1039/c5nr02217g), 2015-01-01
Supplement: c5nr02217g1.pdf [file c5nr02217g1.pdf]

*Supporting information for*

**Mode-specific study of nanoparticle-mediated  
optical interactions in an absorber/metal thin  
film system**

*Binxing Yu<sup>1</sup>, Joseph Woo<sup>2</sup>, Michael Kong<sup>2</sup>, Deirdre M. O'Carroll<sup>1,2</sup>*

<sup>1</sup>Rutgers University, Department of Chemistry and Chemical Biology, 610 Taylor Road,  
Piscataway, NJ 08854.

<sup>2</sup>Rutgers University, Department of Materials Science & Engineering, 607 Taylor Road,  
Piscataway, NJ 08854

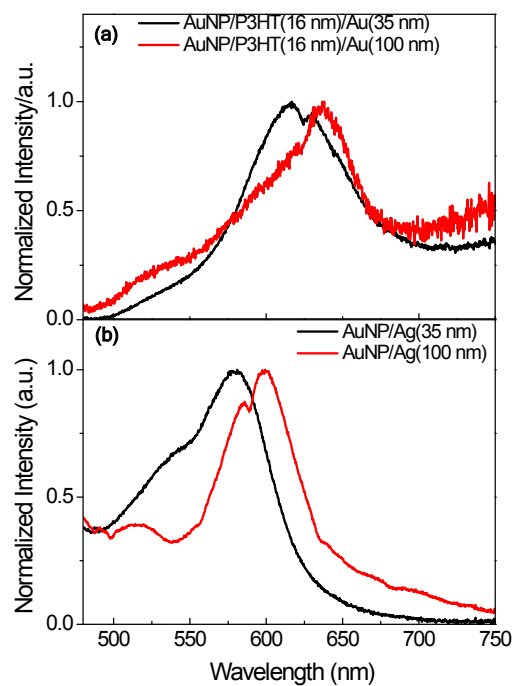

**Figure S1.** Single-particle dark-field spectroscopy of AuNP on (a) a thin P3HT spacer with underlying Au film of different thickness; (b) Ag film of different thickness. In both cases with the increase of thickness of underlying plasmonic metal substrate, the predominant peak at ~600 nm red shifts, which indicates a stronger interaction between vertically polarized LSPR and the image dipole.

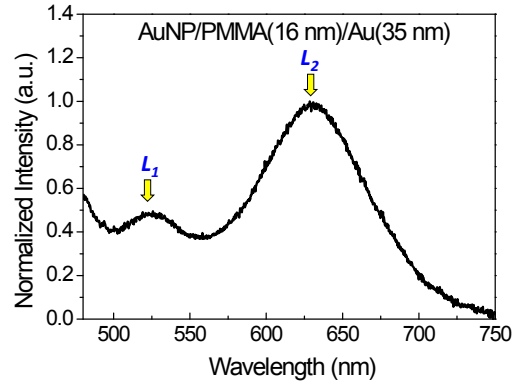

**Figure S2.** Measured dark-field scattering spectra for a single AuNP on a 16-nm-thick PMMA spacer on a 35-nm-thick Au film. The peak at ~535 nm and ~630 nm were attributed to  $L_1$  and  $L_2$  modes, respectively.

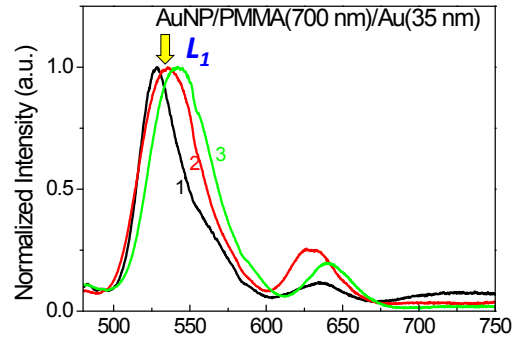

**Figure S3.** Measured scattering spectra for a single AuNP on a PMMA film with 700 nm thickness on a 35-nm-thick Au substrate. The spectra still consisted of two peaks. The peak at 535 nm was attributed to the LSPR peak of the AuNP ( $L_1$ ). In this case, the polarizability of the PMMA still contributed a small shift relative to the value in aqueous solution. Also, since  $t_s$  here was comparable to the wavelength of incident light, we had to consider the possible effect of Fabry-Perot resonances. This may be the reason why the particle LSPR peak was so intense—the

cavity created by NP-film system was tuned to the resonance wavelength. The peak at around 630 nm was attributed to out-coupling of SPP modes on the Au film since hardly any interaction was expected between LSPR and SPPs at this distance.

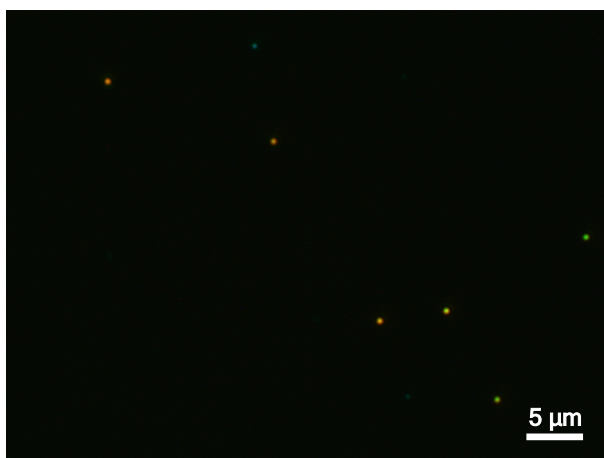

**Figure S4.** A representative dark-field image of AuNP/PMMA(16 nm)/Au film(35 nm). Both “green” and “red” particles can be observed. The formation of “red” particles in this case was attributed to the strong vertical image dipole coupling ( $L_2$ ) which can exist at sub-20-nm spacer thickness.

|                                 | Green   | Red    |
|---------------------------------|---------|--------|
| AuNP/glass                      | 100.00% | 0.00%  |
| AuNP/Si                         | 100.00% | 0.00%  |
| AuNP/Au film(35 nm)             | 90.90%  | 9.10%  |
| AuNP/Au film(100 nm)            | 92.10%  | 7.90%  |
| AuNP/PMMA(16 nm)/Au film(35 nm) | 50.00%  | 50.00% |
| AuNP/PMMA(50 nm)/Au film(35 nm) | 95.00%  | 5.00%  |
| AuNP/P3HT(16 nm)/Au film(35 nm) | 32.00%  | 68.00% |
| AuNP/P3HT(50 nm)/Au film(35 nm) | 29.60%  | 70.40% |
| AuNP/P3HT(65 nm)/Au film(35 nm) | 30.80%  | 69.20% |

**Table S1.** The percentage of “red” and “green” particles in different sample sets. Data were taken over several random areas and, in total, over 50 NPs from each sample type were analyzed.
